# Supplementary material
Source: PubMed Central journal article supplement (PMC10257978)

**Table S1.** Differences in demographic and clinical characteristics among children of different race/ethnicity at transplant.

| Factor         | African American<br>(N=563) |                               | Caucasian<br>(N=1,509) |                               | Hispanic<br>(N=570) |                               | Asian<br>(N=125) |                               | Other<br>(N=98) |                               | p-value                      |
|----------------|-----------------------------|-------------------------------|------------------------|-------------------------------|---------------------|-------------------------------|------------------|-------------------------------|-----------------|-------------------------------|------------------------------|
|                | N                           | Median [P25, P75]<br>or N (%) | N                      | Median [P25, P75]<br>or N (%) | N                   | Median [P25, P75]<br>or N (%) | N                | Median [P25, P75]<br>or N (%) | N               | Median [P25, P75]<br>or N (%) | p-value                      |
| Age <1 (years) | 563                         | 155 (27.5)                    | 1,509                  | 455 (30.2)                    | 570                 | 169 (29.6)                    | 125              | 20 (16.0)                     | 98              | 38 (38.8)                     | 0.052 <sup>b</sup>           |
| Weight (kg)    | 563                         | 21.5 [8.0, 50.0]              | 1,509                  | 16.1 [7.3, 45.9]              | 570                 | 15.6 [7.6, 42.2]              | 125              | 17.7 [8.9, 33.7]              | 98              | 11.5 [6.8, 46.4]              | <b>0.042<sup>b</sup></b>     |
| Female         | 563                         | 254 (45.1)                    | 1,509                  | 633 (41.9)                    | 570                 | 267 (46.8)                    | 125              | 62 (49.6)                     | 98              | 41 (41.8)                     | 0.17 <sup>c</sup>            |
| Diagnosis      | 563                         |                               | 1,509                  |                               | 570                 |                               | 125              |                               | 98              |                               | <b>&lt;0.001<sup>c</sup></b> |
| CMP            |                             | 315 (56.0) <sup>#¶</sup>      |                        | 683 (45.3) <sup>*¶</sup>      |                     | 293 (51.4) <sup>¶</sup>       |                  | 93 (74.4) <sup>**§ Ω</sup>    |                 | 50 (51.0) <sup>¶</sup>        |                              |
| CHD            |                             | 239 (42.5)                    |                        | 809 (53.6)                    |                     | 270 (47.4)                    |                  | 29 (23.2)                     |                 | 47 (48.0)                     |                              |
| Status 1A      | 563                         | 410 (72.8)                    | 1,509                  | 1,019 (67.5)                  | 570                 | 361 (63.3)                    | 125              | 79 (63.2)                     | 98              | 69 (70.4)                     | <b>0.012<sup>c</sup></b>     |
| ICU            | 563                         | 370 (65.7) <sup>#</sup>       | 1,509                  | 848 (56.2) <sup>*</sup>       | 570                 | 330 (57.9)                    | 125              | 74 (59.2)                     | 98              | 64 (65.3)                     | <b>0.002<sup>c</sup></b>     |
| ICD Use        | 561                         | 42 (7.5)                      | 1,503                  | 154 (10.2)                    | 570                 | 45 (7.9)                      | 125              | 16 (12.8)                     | 98              | 5 (5.1)                       | 0.060 <sup>c</sup>           |
| Blood Type O   | 563                         | 282 (50.1) <sup>#¶</sup>      | 1,509                  | 641 (42.5) <sup>**§</sup>     | 570                 | 323 (56.7) <sup>#¶Ω</sup>     | 125              | 39 (31.2) <sup>**§</sup>      | 98              | 36 (36.7) <sup>§</sup>        | <b>&lt;0.001<sup>c</sup></b> |
| IV Inotropes   | 563                         | 369 (65.5) <sup>§</sup>       | 1,509                  | 993 (65.8) <sup>§</sup>       | 570                 | 323 (56.7) <sup>**#</sup>     | 125              | 72 (57.6)                     | 98              | 56 (57.1)                     | <b>&lt;0.001<sup>c</sup></b> |
| Ventilator     | 563                         | 252 (44.8)                    | 1,509                  | 605 (40.1)                    | 570                 | 227 (39.8)                    | 125              | 47 (37.6)                     | 98              | 45 (45.9)                     | 0.22 <sup>c</sup>            |
| ECMO           | 563                         | 34 (6.0)                      | 1,509                  | 109 (7.2)                     | 570                 | 25 (4.4)                      | 125              | 7 (5.6)                       | 98              | 11 (11.2)                     | 0.051 <sup>c</sup>           |
| VAD            | 563                         | 181 (32.1) <sup>#</sup>       | 1,509                  | 380 (25.2) <sup>*¶</sup>      | 570                 | 159 (27.9)                    | 125              | 47 (37.6) <sup>#</sup>        | 98              | 26 (26.5)                     | <b>0.002<sup>c</sup></b>     |
| eGFR           | 560                         | 246 (43.9)                    | 1,496                  | 556 (37.2)                    | 562                 | 213 (37.9)                    | 121              | 42 (34.7)                     | 97              | 38 (39.2)                     | 0.063 <sup>c</sup>           |

|                                |     |                   |       |                   |     |                   |     |                 |    |                 |                              |
|--------------------------------|-----|-------------------|-------|-------------------|-----|-------------------|-----|-----------------|----|-----------------|------------------------------|
| < 90 mL/min/1.73m <sup>2</sup> |     |                   |       |                   |     |                   |     |                 |    |                 |                              |
| Bilirubin ≥ 2 mg/dl            | 559 | 71 (12.7)         | 1,489 | 162 (10.9)        | 558 | 69 (12.4)         | 124 | 18 (14.5)       | 95 | 10 (10.5)       | 0.59 <sup>c</sup>            |
| Albumin ≤3.5 g/dL              | 552 | 287 (52.0) ¶      | 1,466 | 723 (49.3) ¶      | 559 | 263 (47.0)        | 120 | 43 (35.8) *#    | 94 | 51 (54.3)       | <b>0.016<sup>c</sup></b>     |
| PRA >10%                       | 211 | 45 (21)           | 534   | 135 (25)          | 179 | 51 (28)           | 37  | 10 (27)         | 26 | 10 (38)         | 0.27 <sup>c</sup>            |
| Medicaid                       | 563 | 376 (66.8) #§¶    | 1,509 | 535 (35.5) *§¶Ω   | 570 | 383 (67.2) *#¶Ω   | 125 | 36 (28.8) *#§Ω  | 98 | 52 (53.1) #§¶   | <b>&lt;0.001<sup>c</sup></b> |
| Ischemic Time > 3.5<br>(hours) | 560 | 298 (53.2)        | 1,505 | 815 (54.2)        | 569 | 322 (56.6)        | 124 | 73 (58.9)       | 98 | 63 (64.3)       | 0.21 <sup>c</sup>            |
| Waitlist Time (months)         | 563 | 1.9 [0.80, 3.7] § | 1,509 | 2.1 [0.80, 4.5] § | 570 | 2.5 [1.2, 5.7] *# | 125 | 1.9 [0.60, 3.8] | 98 | 2.2 [1.00, 5.5] | <b>&lt;0.001<sup>b</sup></b> |

p-values: b=Kruskal-Wallis test, c=Pearson's chi-square test. Boldface P values: statistically significant (P < 0.05). Post hoc pairwise comparisons used Bonferroni adjustment.

\* Significantly different from African American.

# Significantly different from Caucasian.

§ Significantly different from Hispanic.

¶ Significantly different from Asian.

Ω Significantly different from Other.

CHD, congenital heart disease; CMP, cardiomyopathy; ECMO, extracorporeal membrane oxygenation; eGFR, estimated glomerular filtration rate; ICU, intensive care unit; ICD, implantable cardioverter defibrillator; IV, intravenous; PRA, panel reactive antibody; VAD, ventricular assist device

**Table S2.** Differences in donor characteristics among patients of different race/ethnicity.

|                                       | African American<br>(N=563) |                               | Caucasian<br>(N=1,509) |                               | Hispanic<br>(N=570) |                               | Asian<br>(N=125) |                               | Other<br>(N=98) |                               | p-value                      |
|---------------------------------------|-----------------------------|-------------------------------|------------------------|-------------------------------|---------------------|-------------------------------|------------------|-------------------------------|-----------------|-------------------------------|------------------------------|
| Factor                                | N                           | Median [P25, P75]<br>or N (%) | N                      | Median [P25, P75]<br>or N (%) | N                   | Median [P25, P75]<br>or N (%) | N                | Median [P25, P75]<br>or N (%) | N               | Median [P25, P75]<br>or N (%) | p-value                      |
| Age (years)                           | 563                         | 8.0 [1.0, 16.0]               | 1,509                  | 5.0 [1.0, 15.0]               | 570                 | 5.0 [1.0, 14.0]               | 125              | 5.0 [1.0, 13.0]               | 98              | 3.0 [1.0, 14.0]               | <b>0.050<sup>b</sup></b>     |
| D-R Age difference (years)            | 563                         | 1.00 [0, 4.0] <sup>#¶</sup>   | 1,509                  | 0 [0, 2.0] <sup>*</sup>       | 570                 | 1.0 [0, 3.0] <sup>¶</sup>     | 125              | 0 [-1.0, 2.0] <sup>*§</sup>   | 98              | 1.0 [0, 2.0]                  | <b>0.001<sup>b</sup></b>     |
| D/R Height Ratio                      | 561                         | 1.1 [1.0, 1.2] <sup>§</sup>   | 1,497                  | 1.1 [1.0, 1.2] <sup>§¶</sup>  | 562                 | 1.1 [1.0, 1.2] <sup>*#¶</sup> | 121              | 1.0 [1.0, 1.1] <sup>#§Ω</sup> | 97              | 1.1 [1.0, 1.2] <sup>¶</sup>   | <b>&lt;0.001<sup>b</sup></b> |
| D/R Weight Ratio                      | 563                         | 1.3 [1.0, 1.5]                | 1,509                  | 1.2 [1.0, 1.6]                | 570                 | 1.2 [1.0, 1.6]                | 125              | 1.1 [1.0, 1.6]                | 98              | 1.2 [1.0, 1.8]                | 0.33 <sup>b</sup>            |
| Female                                | 563                         | 200 (35.5)                    | 1,509                  | 602 (39.9)                    | 570                 | 229 (40.2)                    | 125              | 49 (39.2)                     | 98              | 30 (30.6)                     | 0.16 <sup>c</sup>            |
| Cause of Death                        | 563                         |                               | 1,509                  |                               | 570                 |                               | 125              |                               | 98              |                               | 0.30 <sup>c</sup>            |
| Anoxia                                |                             | 236 (41.9)                    |                        | 646 (42.8)                    |                     | 273 (47.9)                    |                  | 66 (52.8)                     |                 | 37 (37.8)                     |                              |
| CVA/stroke                            |                             | 30 (5.3)                      |                        | 77 (5.1)                      |                     | 27 (4.7)                      |                  | 7 (5.6)                       |                 | 5 (5.1)                       |                              |
| Head trauma                           |                             | 276 (49.0)                    |                        | 733 (48.6)                    |                     | 248 (43.5)                    |                  | 51 (40.8)                     |                 | 51 (52.0)                     |                              |
| Other                                 |                             | 21 (3.7)                      |                        | 53 (3.5)                      |                     | 22 (3.9)                      |                  | 1 (0.80)                      |                 | 5 (5.1)                       |                              |
| CDC Increased Risk Donor <sup>‡</sup> | 563                         | 51 (9.1)                      | 1,508                  | 155 (10.3)                    | 570                 | 47 (8.2)                      | 125              | 8 (6.4)                       | 98              | 9 (9.2)                       | 0.46 <sup>c</sup>            |
| Donor Drug Abuse                      | 562                         | 86 (15.3)                     | 1,501                  | 184 (12.3)                    | 569                 | 61 (10.7)                     | 125              | 12 (9.6)                      | 98              | 10 (10.2)                     | 0.12 <sup>c</sup>            |
| Donor eGFR mL/min/1.73m <sup>2</sup>  | 562                         | 90.5 [64.0, 125.6]            | 1,508                  | 96.6 [65.2, 133.1]            | 569                 | 101.6 [68.2, 140.4]           | 125              | 97.3 [68.9, 140.4]            | 98              | 91.1 [63.0, 120.0]            | <b>0.046<sup>b</sup></b>     |
| Donor LVEF (%)                        | 552                         | 65.0 [60.0, 70.0]             | 1,474                  | 65.0 [60.0, 70.0]             | 555                 | 65.0 [60.0, 69.0]             | 125              | 65.0 [59.0, 70.0]             | 96              | 65.0 [59.0, 70.0]             | 0.65 <sup>b</sup>            |
| Donor Inotropic Support               | 562                         | 233 (41.5)                    | 1,508                  | 634 (42.0)                    | 569                 | 215 (37.8)                    | 125              | 49 (39.2)                     | 98              | 36 (36.7)                     | 0.40 <sup>c</sup>            |

p-values: b=Kruskal-Wallis test, c=Pearson's chi-square test. . Boldface P values: statistically significant ( $P < 0.05$ ). Post hoc pairwise comparisons used Bonferroni adjustment.

\* Significantly different from African American.

# Significantly different from Caucasian.

§ Significantly different from Hispanic.

¶ Significantly different from Asian.

Ω Significantly different from Other.

CDC indicates centers for disease control and prevention; CVA, cerebrovascular accident; D, donor; eGFR, estimated glomerular filtration rate; LVEF, left ventricular ejection fraction; R, Recipient

‡ Refers to Public Health Service Increased risk donors which are donors deemed to be at higher risk for HIV prior to 2013 and HIV, HBV and HCV after 2013.

**Figure S1.** Cumulative percentage of patients transplanted by differing race/ethnicity at the time of listing.

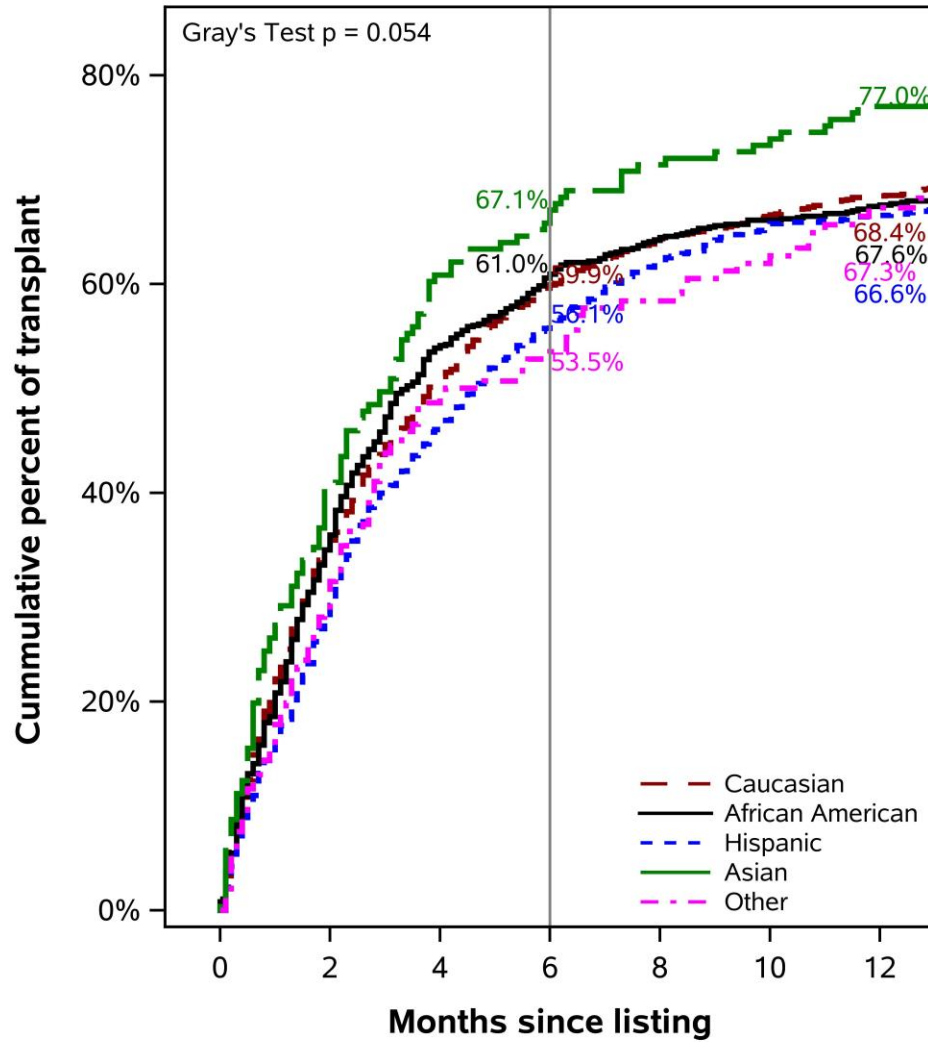

**Figure S2.** Cumulative percentage of patients that died or were delisted because of clinical deterioration by differing race/ethnicity at the time of listing.

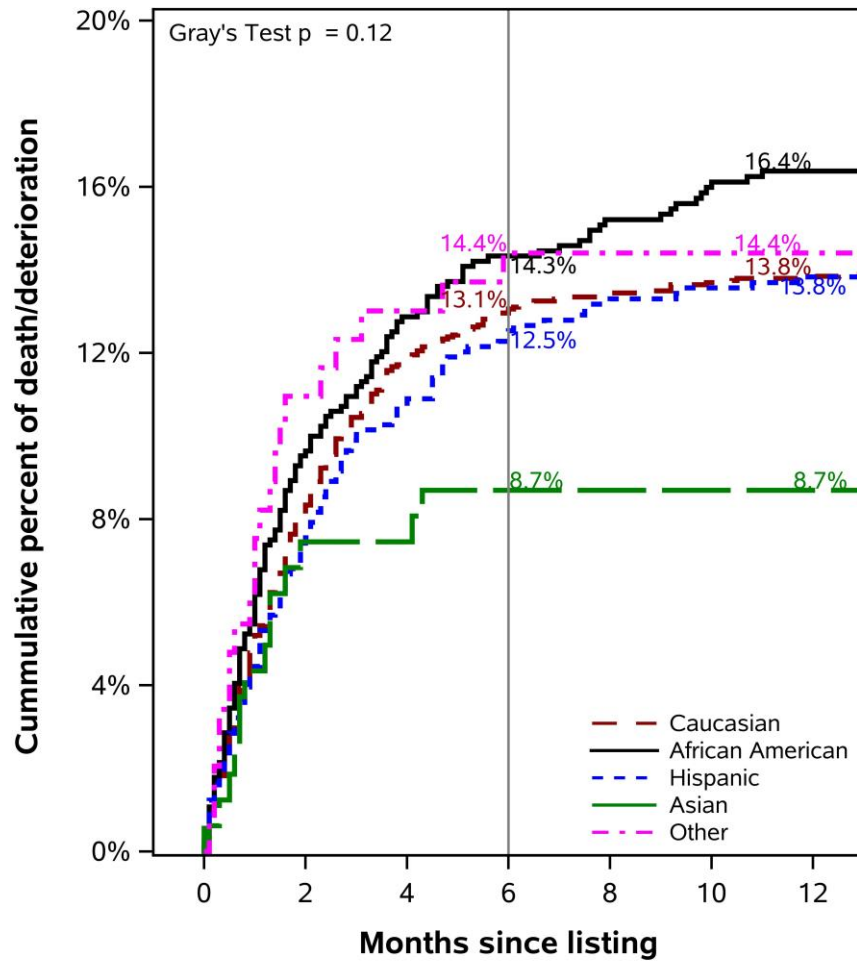

Supplement: NIHMS1906162-supplement-supp_1.pdf [file NIHMS1906162-supplement-supp_1.pdf]
